# Supplementary material for: An atmospheric pressure ion funnel with a slit entrance for enhancing signal and resolution in high resolution differential ion mobility mass spectrometry
Source: Royal Society of Chemistry journal article supplement (doi:10.1039/d1an01942b), 2022-01-01
Supplement: d1an01942b1.pdf [file d1an01942b1.pdf]

Supporting Information

**An atmospheric pressure ion funnel with a slit entrance for  
enhancing signal and resolution in high resolution differential ion  
mobility mass spectrometry**

K. M. Mohibul Kabir, Ezaz Ahmed, and William A. Donald

*School of Chemistry, University of New South Wales, Sydney, NSW 2052, Australia.*

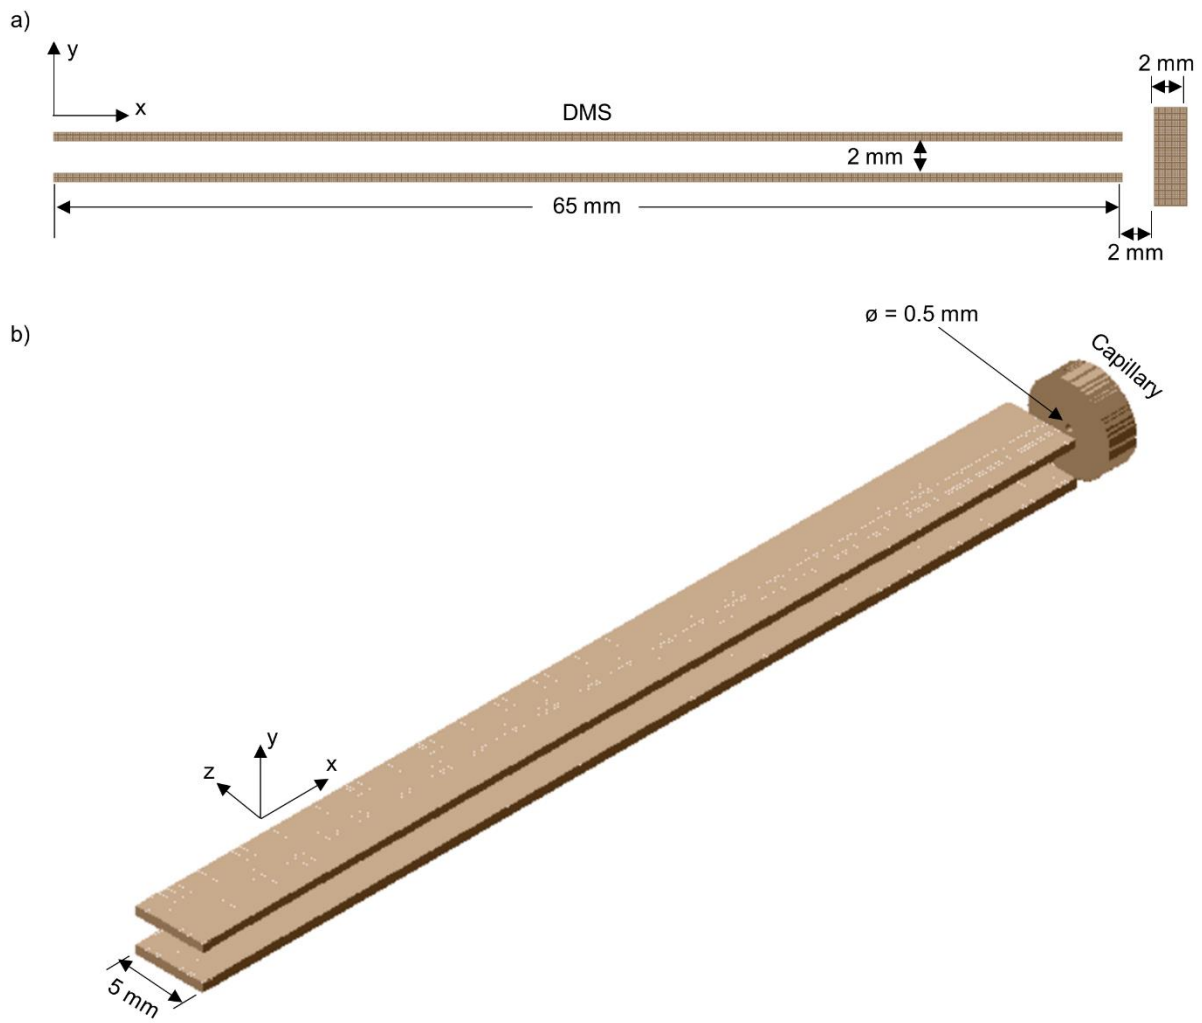

**Figure S1:** a) Cross-sectional and b) three dimensional views of a DMS-capillary interface.

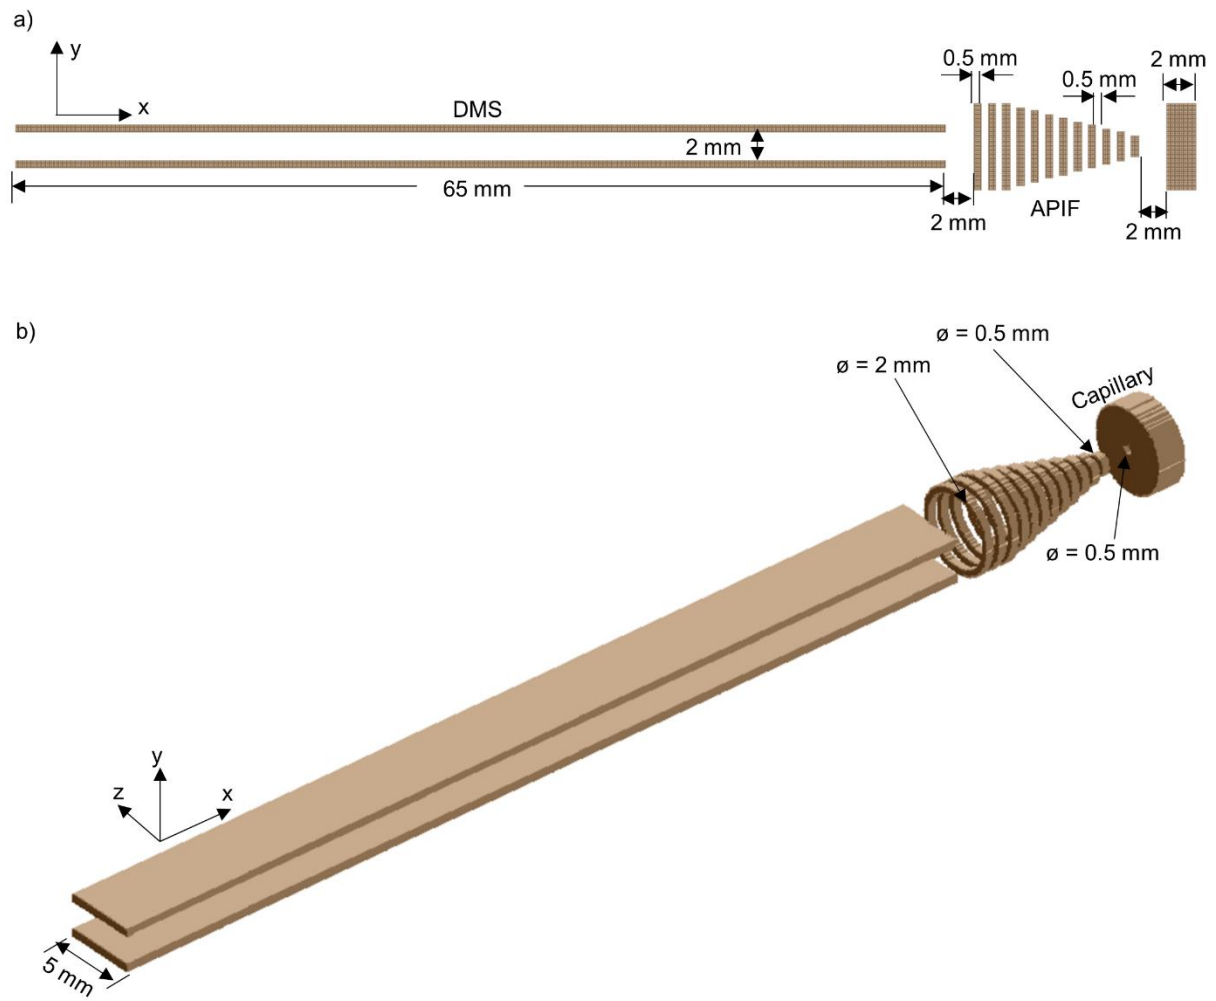

**Figure S2:** a) Cross-sectional and b) three dimensional views of a DMS-APIF interface.

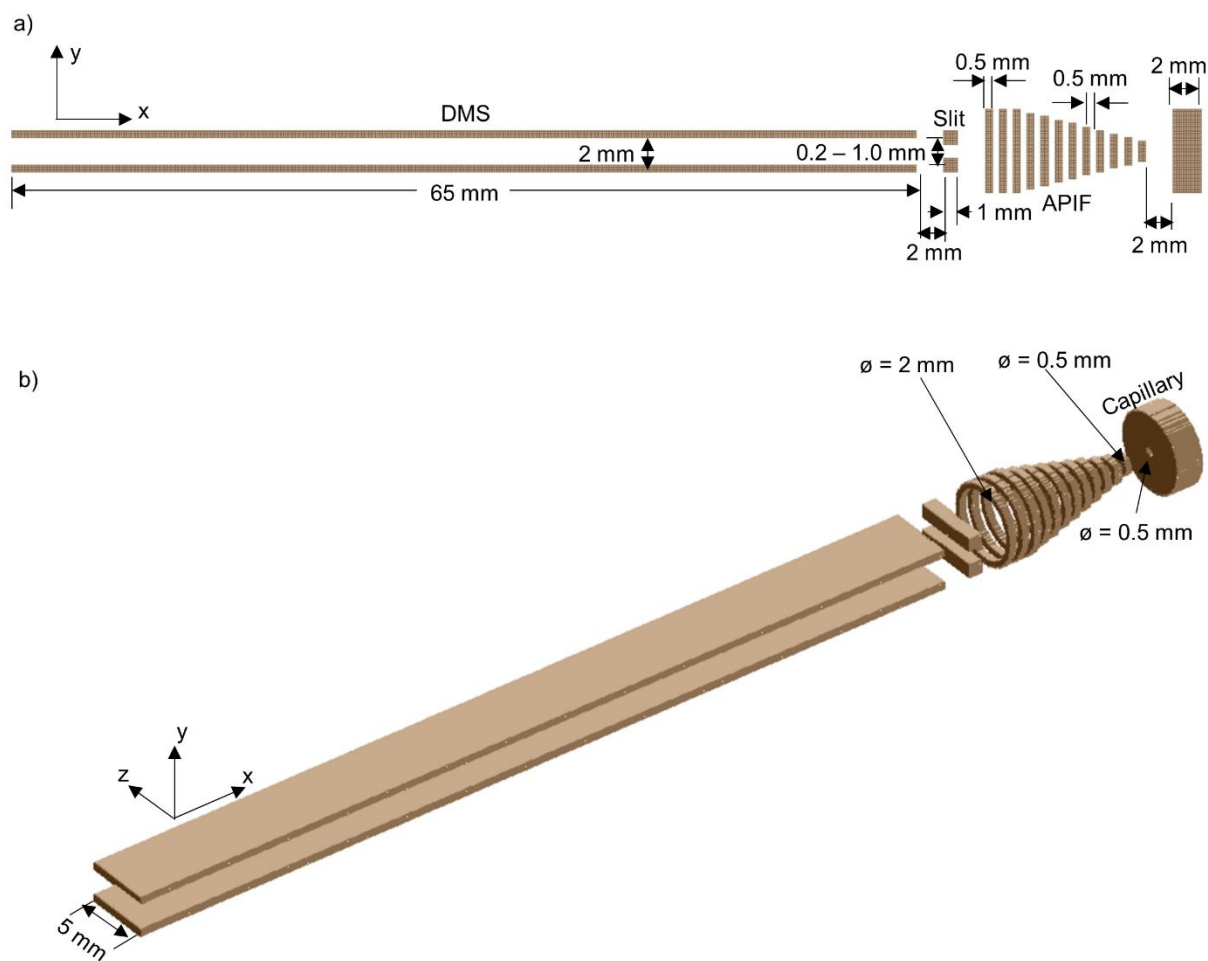

**Figure S3:** a) Cross-sectional and b) three dimensional views of a DMS-Slit-APIF interface.

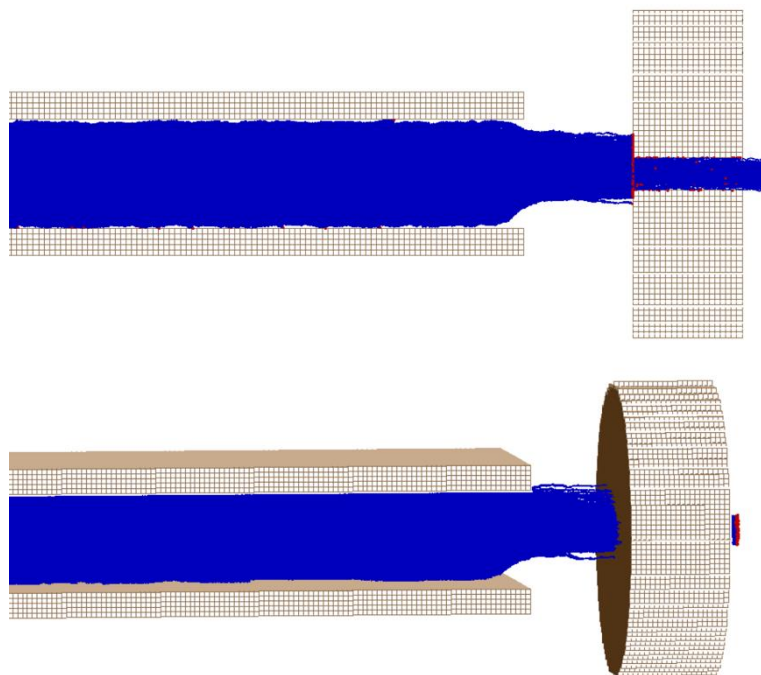

**Figure S4:** Magnified view of simulated ion trajectories in a DMS-capillary interface for [DMMP+H]<sup>+</sup> at a CV of -19.3 V. A carrier gas flow rate, dispersion voltage and APIF RF amplitude of 4.0 L/min, 5.0 kV and 750 V were used.

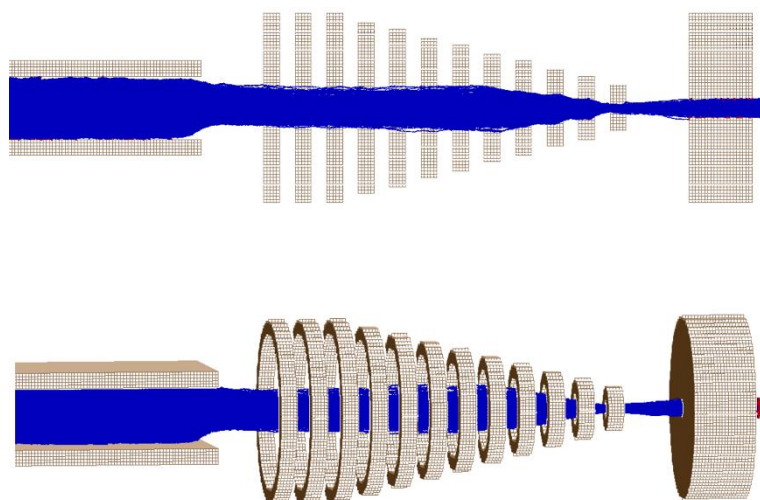

**Figure S5:** Magnified view of simulated ion trajectories in a DMS-APIF interface for [DMMP+H]<sup>+</sup> at a CV of -19.3 V. A carrier gas flow rate, dispersion voltage and APIF RF amplitude of 4.0 L/min, 5.0 kV and 750 V were used.

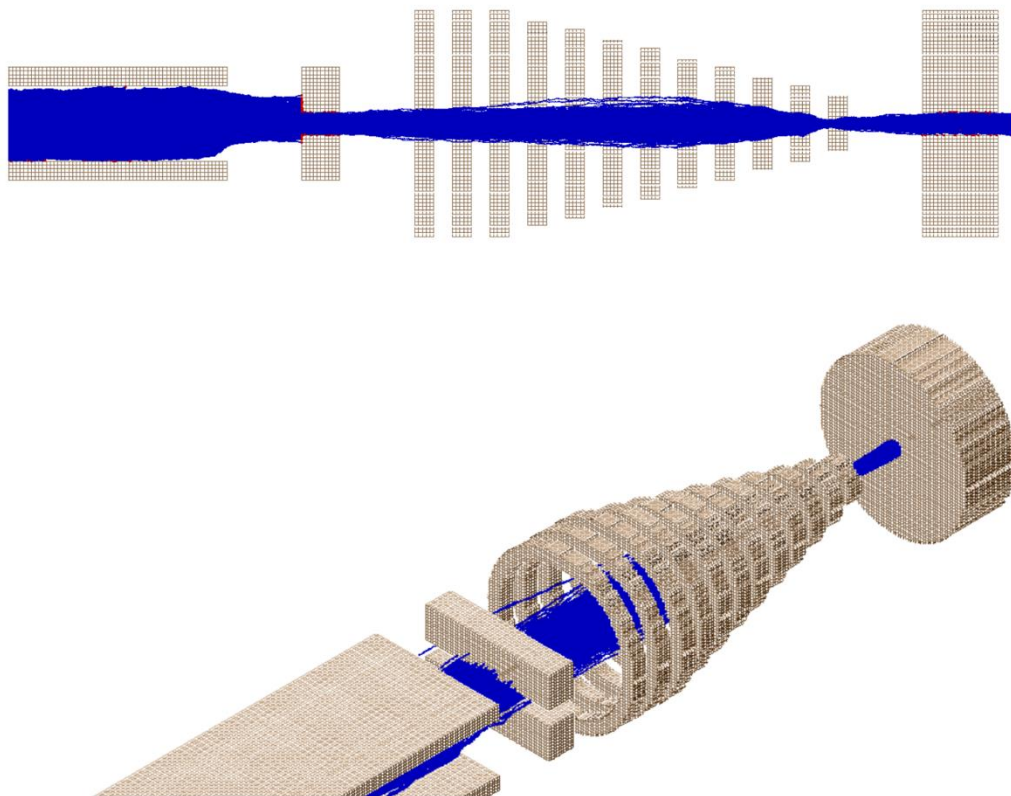

**Figure S6:** Magnified view of simulated ion trajectories in a DMS-Slit-APIF interface for [DMMP+H]<sup>+</sup> at a CV of -19.3 V. A carrier gas flow rate, dispersion voltage and APIF RF amplitude of 4.0 L/min, 5.0 kV and 750 V were used.

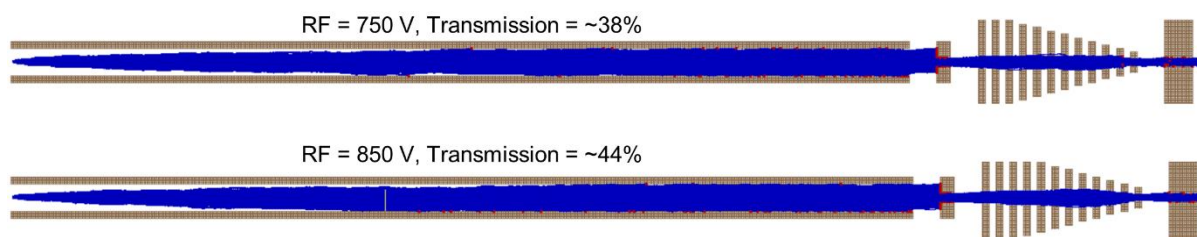

**Figure S7:** Simulated ion trajectories in a DMS-Slit-APIF interface for [ubiquitin+12H]<sup>12+</sup> at a CV of 13.5 V using different APIF RF amplitudes of 750 and 850 V. A carrier gas flow rate and dispersion voltage of 4.0 L/min and 5.0 kV were used.



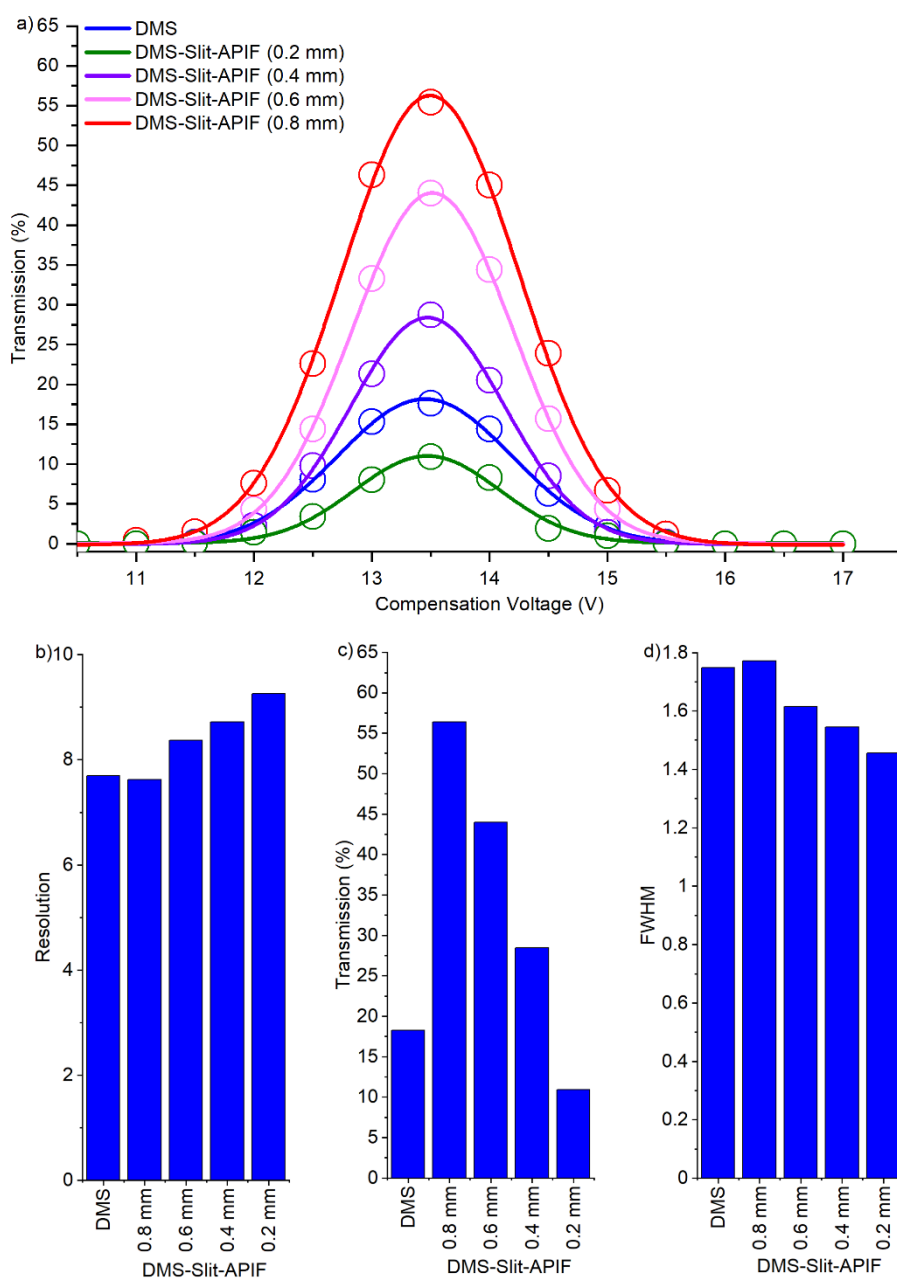

**Figure S8:** (a) Representative calculated DMS spectra and the resulting values for (b) resolving power, (c) ion transmission efficiency, and (d) FWHM for [ubiquitin+12H]<sup>12+</sup> in a DMS-Slit-APIF interface with different slit gap widths. A carrier gas flow rate, dispersion voltage and APIF RF amplitude of 4.0 L/min, 5.0 kV and 850 V were used.

**Table S1:** Electrical parameters used for simulations

| <b>Component</b> | <b>Parameter</b>   | <b>Value</b>                                                              |
|------------------|--------------------|---------------------------------------------------------------------------|
| DMS              | Dispersion voltage | 4-5 kV                                                                    |
|                  | Wave period        | 1 $\mu$ s                                                                 |
|                  | Duty cycle         | 0.33                                                                      |
|                  | DC biasing voltage | 60 V (DMS model)<br>125 V (DMS-APIF model)<br>135 V (DMS-Slit-APIF model) |
| APIF             | RF amplitude       | 150 to 950 V                                                              |
|                  | RF frequency       | 0.7 MHz                                                                   |
|                  | DC gradient        | 5 V/mm                                                                    |
| Slit             | DC biasing voltage | 125 V                                                                     |
| Capillary        | DC biasing voltage | 50 V                                                                      |

**Table S2:** Environmental parameters used for simulations

| <b>Parameter</b>          | <b>Value</b>                                     |
|---------------------------|--------------------------------------------------|
| Pressure                  | 760 Torr                                         |
| Temperature               | 298.15 K                                         |
| Gas velocity              | 3.33 to 6.66 m/s                                 |
| Gas mass                  | 28.94515 amu (N <sub>2</sub> ),<br>4.00 amu (He) |
| Collision<br>gas diameter | 0.366 nm (N <sub>2</sub> ),<br>0.260 nm (He)     |

**Table S3:** Ion mobility parameters of simulated ions

| Analyte                                        | Mass (u) | Diameter (nm) | Reduced mobility ( $k_0$ ) ( $10^{-4}\text{m}^2\text{V}^{-1}\text{s}^{-1}$ ) | Mobility constant, $\alpha$ ( $\text{Td}^{-2}$ ) | Mobility constant, $\beta$ ( $\text{Td}^{-4}$ ) |
|------------------------------------------------|----------|---------------|------------------------------------------------------------------------------|--------------------------------------------------|-------------------------------------------------|
| [DMMP+H] <sup>+</sup>                          | 125.1    | 0.54          | 2.05                                                                         | 5.09E-6                                          | -1.58E-10                                       |
| [Tryptophan+H] <sup>+</sup>                    | 205.236  | 0.60          | 2.28                                                                         | 1.27E-6                                          | 1.8E-12                                         |
| [(2-dodecanone) <sub>2</sub> +2H] <sup>+</sup> | 368.6    | 0.68          | 1.39                                                                         | -2.16E-6                                         | -0.84E-10                                       |
| [Ubiquitin+12H] <sup>12+</sup>                 | 8600     | 0.76          | 1.31                                                                         | -2.34E-6                                         | -1.6E-12                                        |
